# Supplementary material
Source: Springer Nature journal article supplement (https://www.springermedizin.de/resource/supplementary/12889_2011_4337_MOESM2_ESM.pdf/9491446)

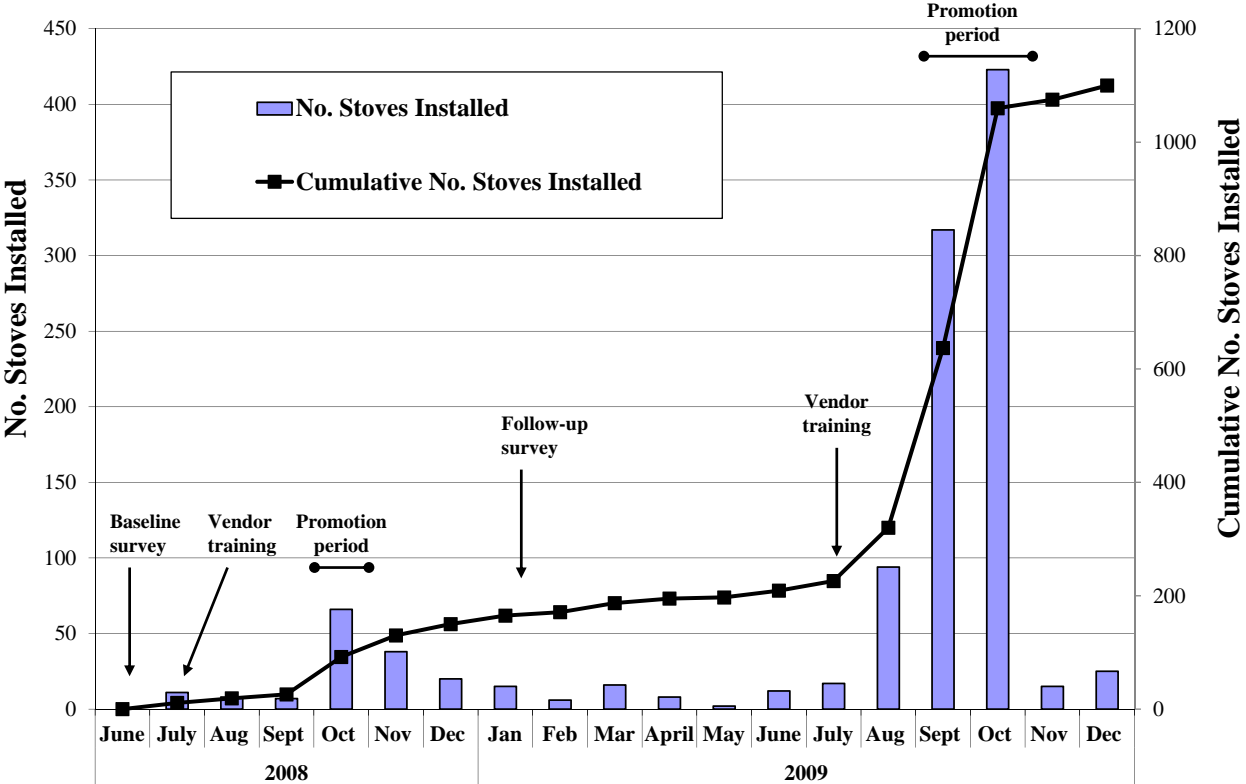

**Initial phase: 10 villages**

**Expansion phase: 50 additional villages**

Supplement: MOESM2 [file 9491446]
